# Supplementary material
Source: PubMed Central journal article supplement (PMC3047591)
Supplement: NIHMS266731-supplement-1_si_001.pdf [file NIHMS266731-supplement-1_si_001.pdf]

# Supporting Information

## **Alkylamine-Ligated H93G Myoglobin Cavity Mutant: A Model System for Endogenous Lysine and Terminal Amine Ligation in Heme Proteins such as Nitrite Reductase and Cytochrome *f***

*Jing Du,<sup>‡</sup> Roshan Perera,<sup>‡,#</sup> and John H. Dawson<sup>\*‡,§</sup>*

<sup>‡</sup> Department of Chemistry and Biochemistry, University of South Carolina, Columbia, SC 20208

<sup>§</sup> School of Medicine, University of South Carolina, Columbia, SC 20208

<sup>#</sup> *Present address: Department of Chemistry and Biochemistry, The University of Texas at Arlington, Arlington, TX 76019-0065. E-mail address: [perera@uta.edu](mailto:perera@uta.edu) (R. Perera)*

\* To whom correspondence should be addressed: Department of Chemistry and Biochemistry, 631 Sumter St., University of South Carolina, Columbia, SC 29208. Phone: (803) 777-7234. Fax: (803)777-9521. E-mail: dawson@sc.edu.

## Figure Legends

**Figure S1.** (a) Soret region and (b) visible region electronic absorption spectral changes upon titration of ferric H93G(0.3 M cyclohexylamine) Mb with sodium nitrite in 0.1 M potassium phosphate buffer, pH 7.0, at 4 °C. Vertical arrows indicate the directions of absorbance change on addition of 1, 3, 5, 10, 21, 40, 78 and 144 mM sodium nitrite. The non-vertical short arrows show isosbestic points.

**Figure S2.** (a) Soret region and (b) visible region electronic absorption spectral changes upon titration of ferric H93G(1 mM Im) Mb with cyclohexylamine in 0.1 M potassium phosphate buffer, pH 7.0, at 4 °C. Vertical arrows indicate the directions of absorbance change on addition of 408, 509, 677, 811, 921, 1012 and 1089 mM cyclohexylamine. The non-vertical short arrows show isosbestic points.

**Figure S3.** MCD (top) and electronic absorption (bottom) spectra of six-coordinate ferrous-CO complexes of cyclohexylamine-bound H93G Mb (solid line) and ferrous-CO H93G(Im) Mb (dashed line). The spectra were recorded in 0.1 M potassium phosphate at pH 7.0 at 4 °C.

**Figure S4.** MCD (top) and electronic absorption (bottom) spectra of ferric H93G(cyclohexylamine) Mb (0.3 M cyclohexylamine) (solid line). The spectra were recorded in 0.1 M potassium phosphate at pH 7.0 at 4 °C.

**Figure S5.** MCD (top) and electronic absorption (bottom) spectra of ferric H93G(bis-cyclohexylamine) Mb (2 M cyclohexylamine) (solid line). The spectra were recorded in 0.1 M potassium phosphate at pH 7.0 at 4 °C.

**Figure S6.** MCD (top) and electronic absorption (bottom) spectra of cyclohexylamine and nitrite (NO<sub>2</sub>)-bound ferric H93G Mb (0.5 M cyclohexylamine, 0.1 M NaNO<sub>2</sub>) (solid line). The spectra were recorded in 0.1 M potassium phosphate at pH 7.0 at 4 °C.

**Figure S7.** MCD (top) and electronic absorption (bottom) spectra of cyclohexylamine and Im-bound ferric H93G Mb (0.2 mM Im, 1 M cyclohexylamine) (solid line). The spectra were recorded in 0.1 M potassium phosphate at pH 7.0 at 4 °C.

**Figure S8.** MCD (top) and electronic absorption (bottom) spectra of the deoxyferrous H93G(cyclohexylamine) Mb (0.3 M cyclohexylamine) (solid line). The spectra were recorded in 0.1 M potassium phosphate at pH 7.0 at 4 °C.

**Figure S9.** MCD (top) and electronic absorption (bottom) spectra of the deoxyferrous H93G(bis-methylamine) Mb (144 mM methylamine) (solid line). The spectra were recorded in 0.1 M potassium phosphate at pH 7.0 at 4 °C.

**Figure S10.** MCD (top) and electronic absorption (bottom) spectra of six-coordinate

ferrous-NO complexes of cyclohexylamine-bound H93G Mb (solid line). The spectra were recorded in 0.1 M potassium phosphate at pH 7.0 at 4 °C.

**Figure S11.** MCD (top) and electronic absorption (bottom) spectra of six-coordinate oxyferrous complexes of cyclohexylamine-bound H93G Mb (solid line). The spectra were recorded in 0.1 M potassium phosphate at pH 7.0 at 4 °C.

**Figure S12.** MCD (top) and electronic absorption (bottom) spectra of ferryl complexes of ethylamine-bound H93G Mb (solid line). The spectra were recorded in 0.1 M potassium phosphate at pH 7.0 at 4 °C.

**Figure S13.** MCD (top) and electronic absorption (bottom) spectra of six-coordinate ferrous-CO complexes of cyclohexylamine-bound H93G Mb (solid line). The spectra were recorded in 0.1 M potassium phosphate at pH 7.0 at 4 °C.

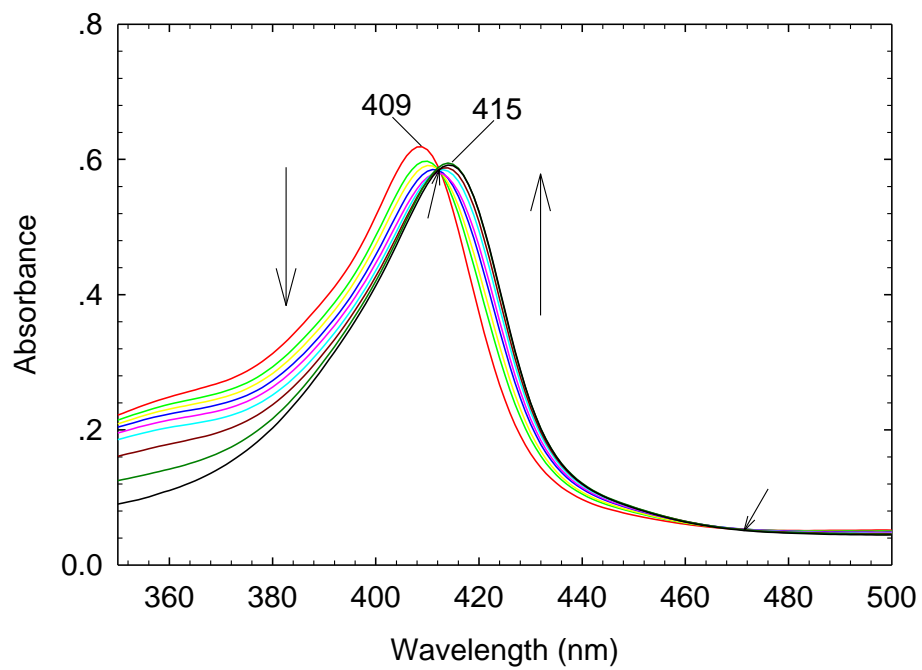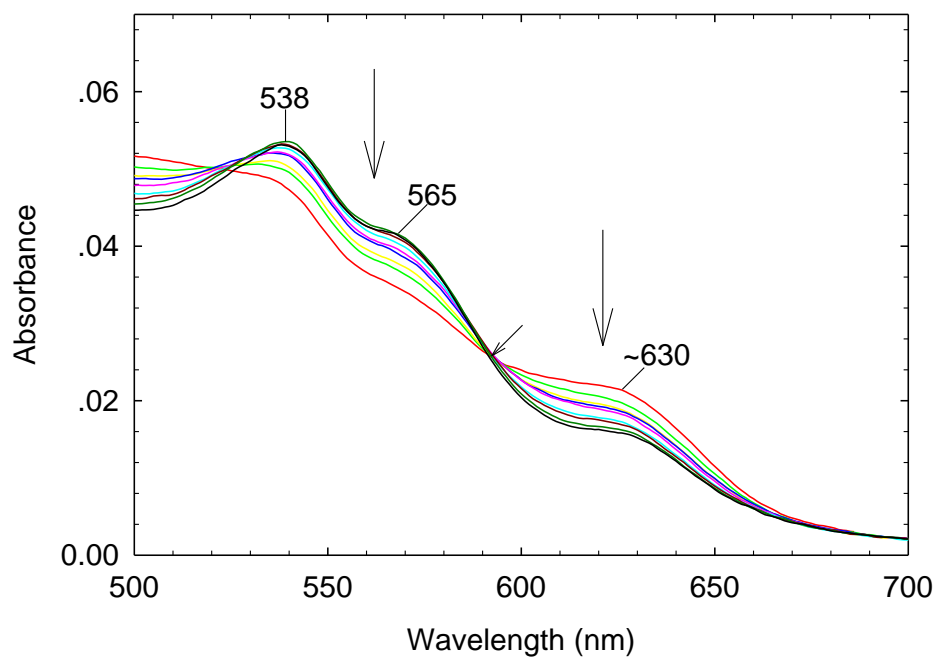

Figure S1

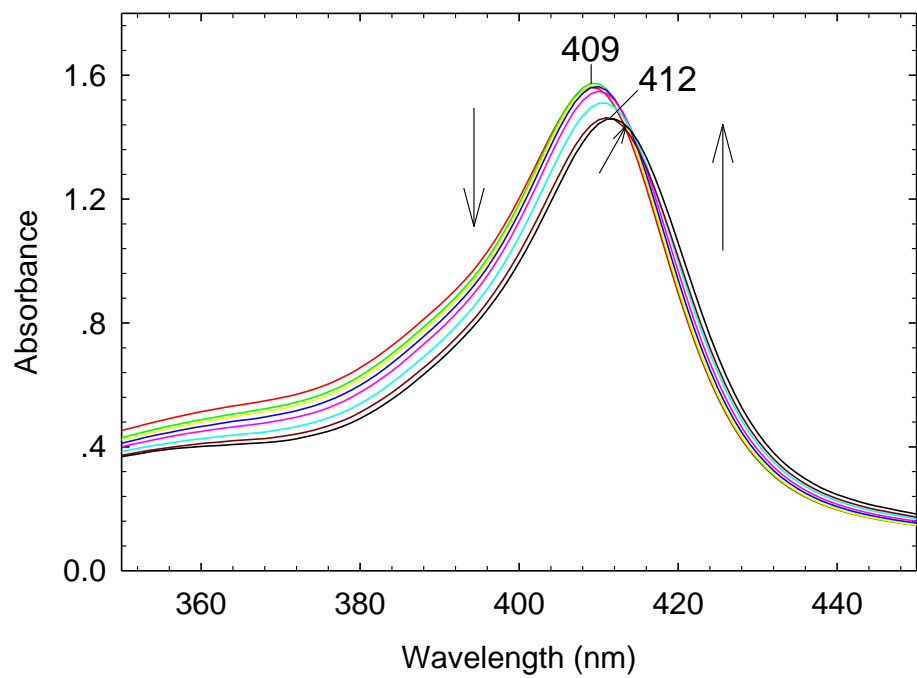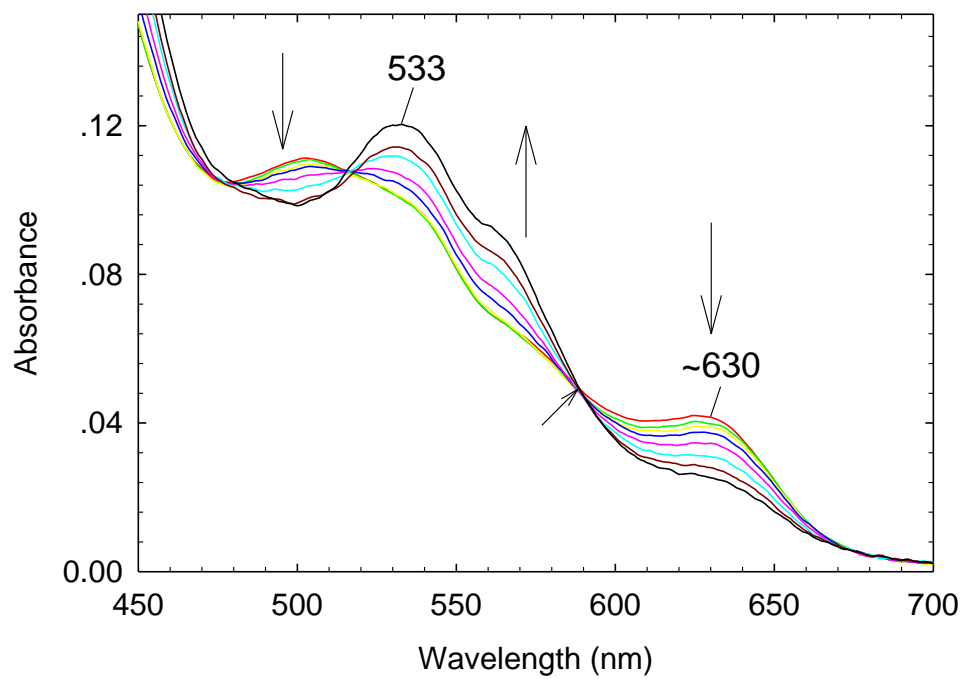

Figure S2

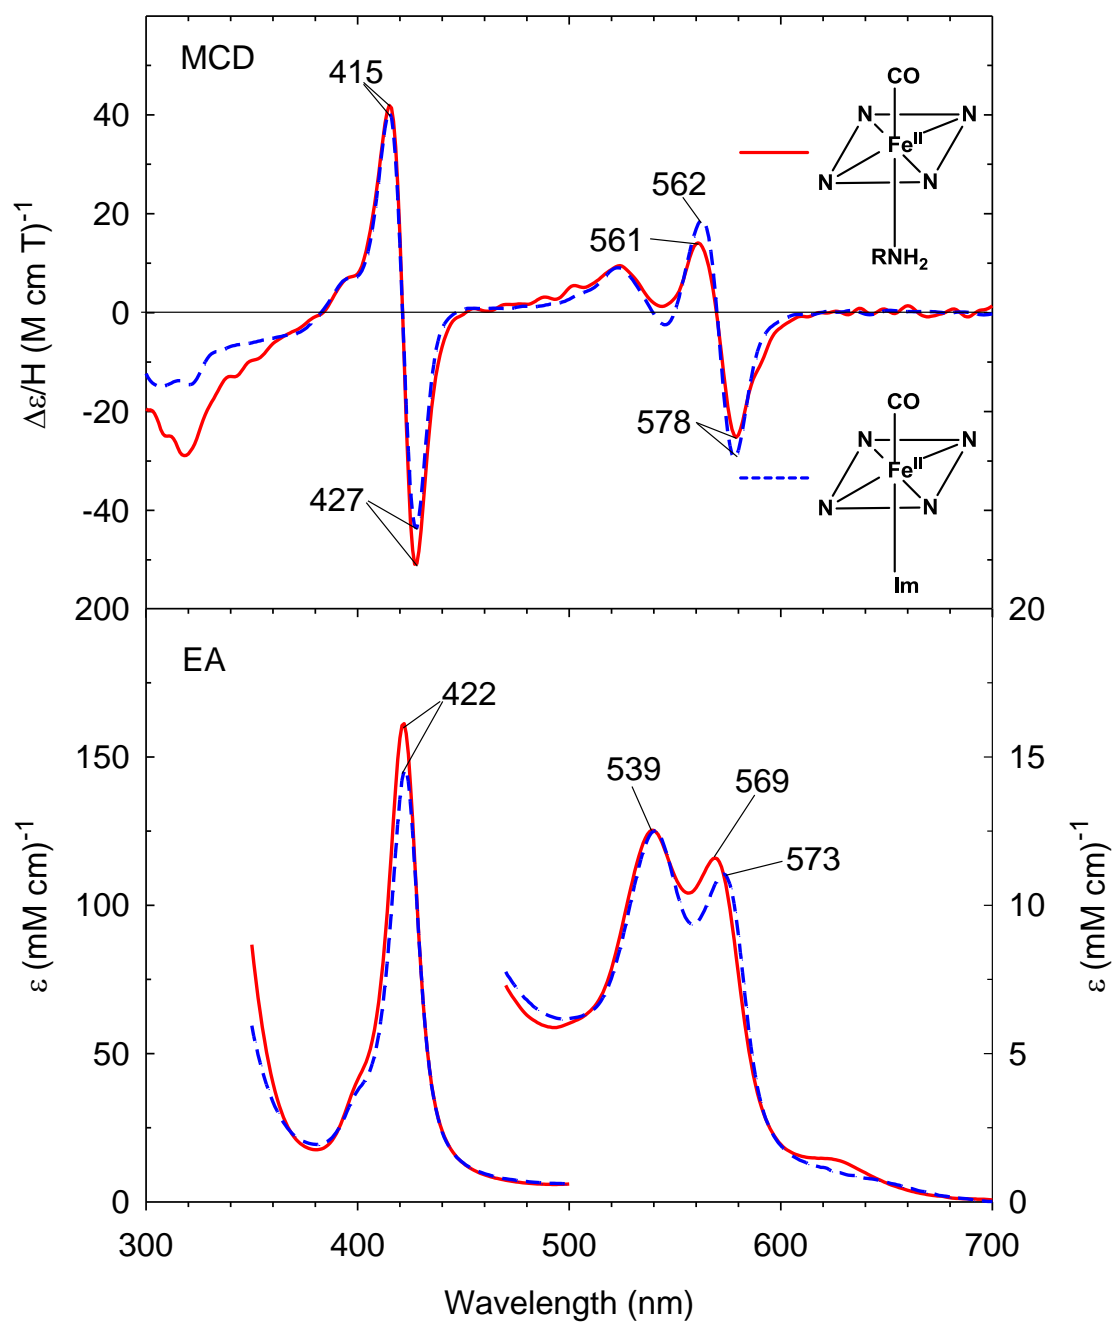

Figure S3

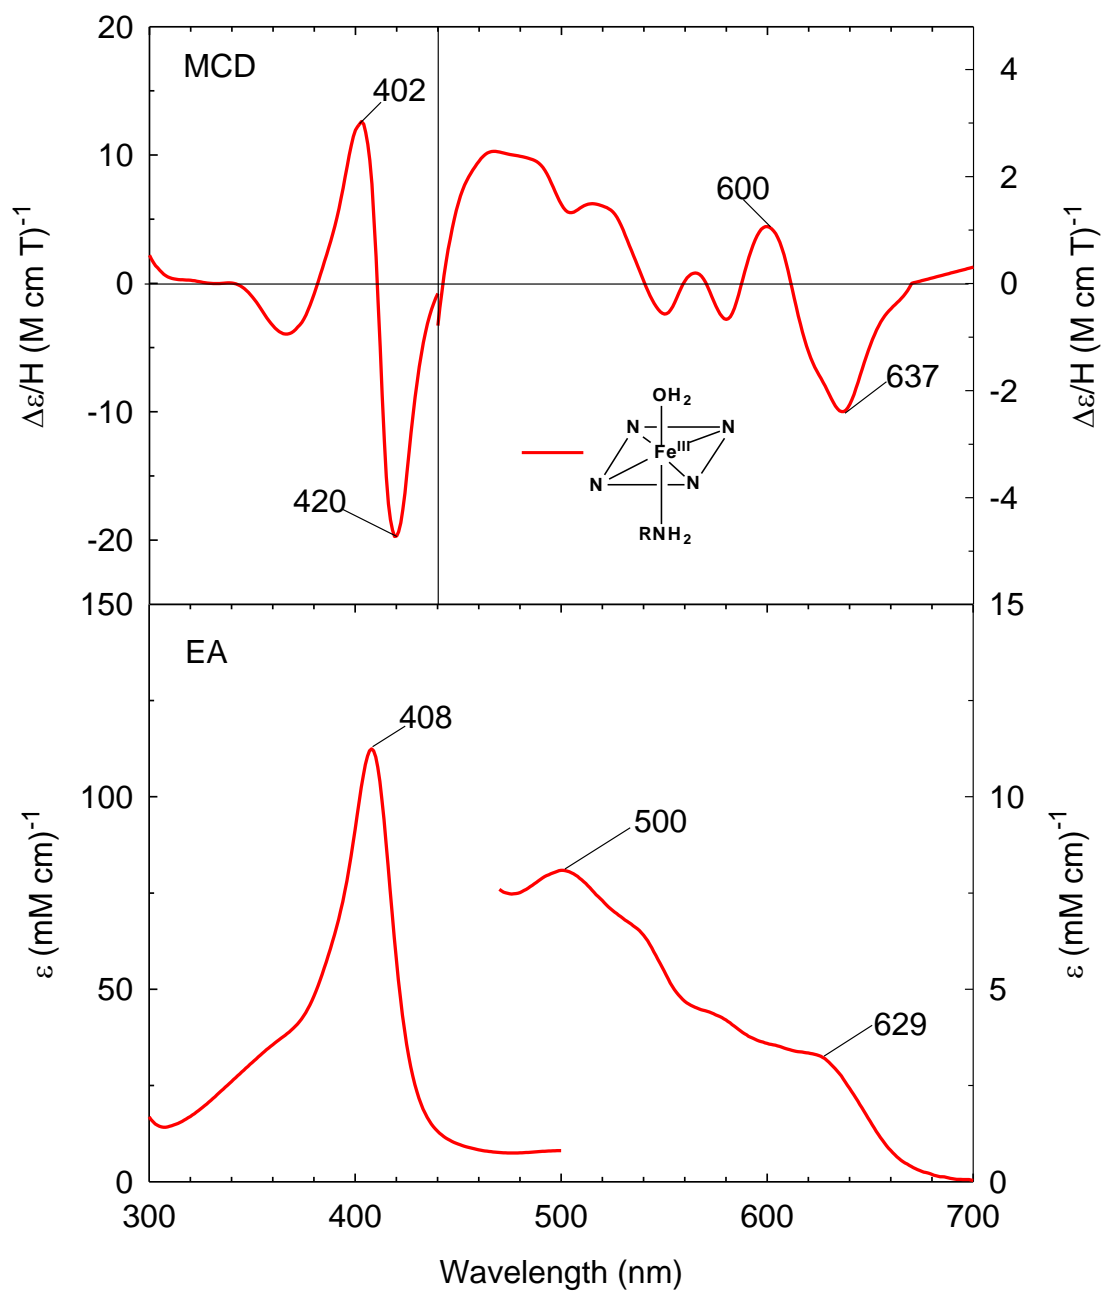

Figure S4



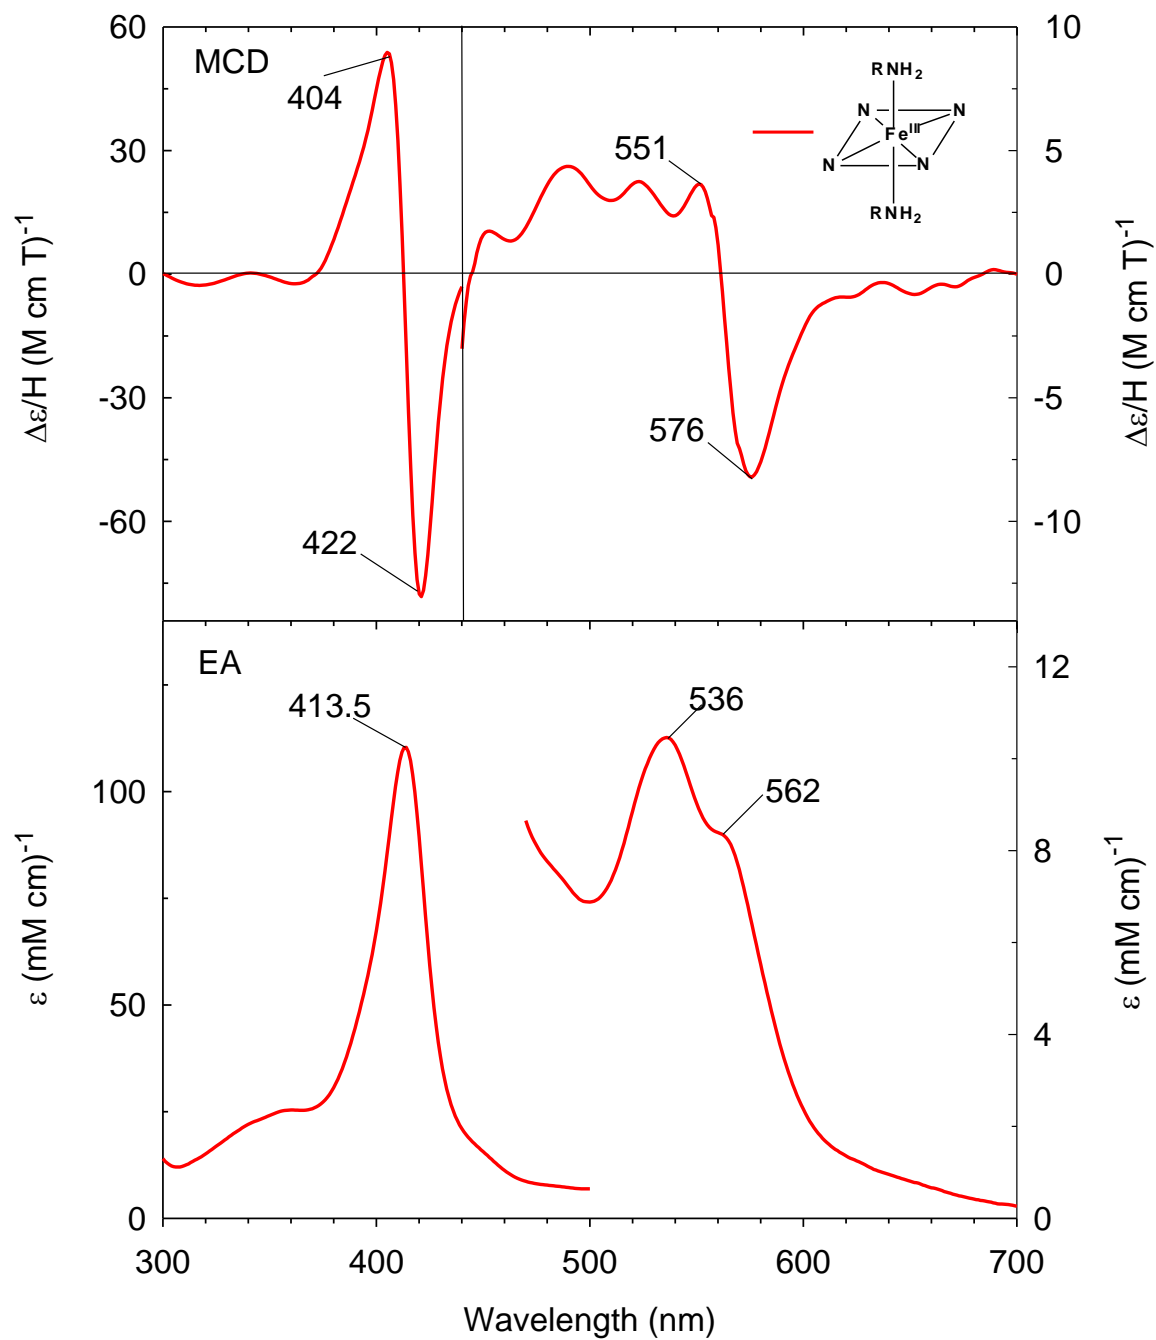

Figure S5

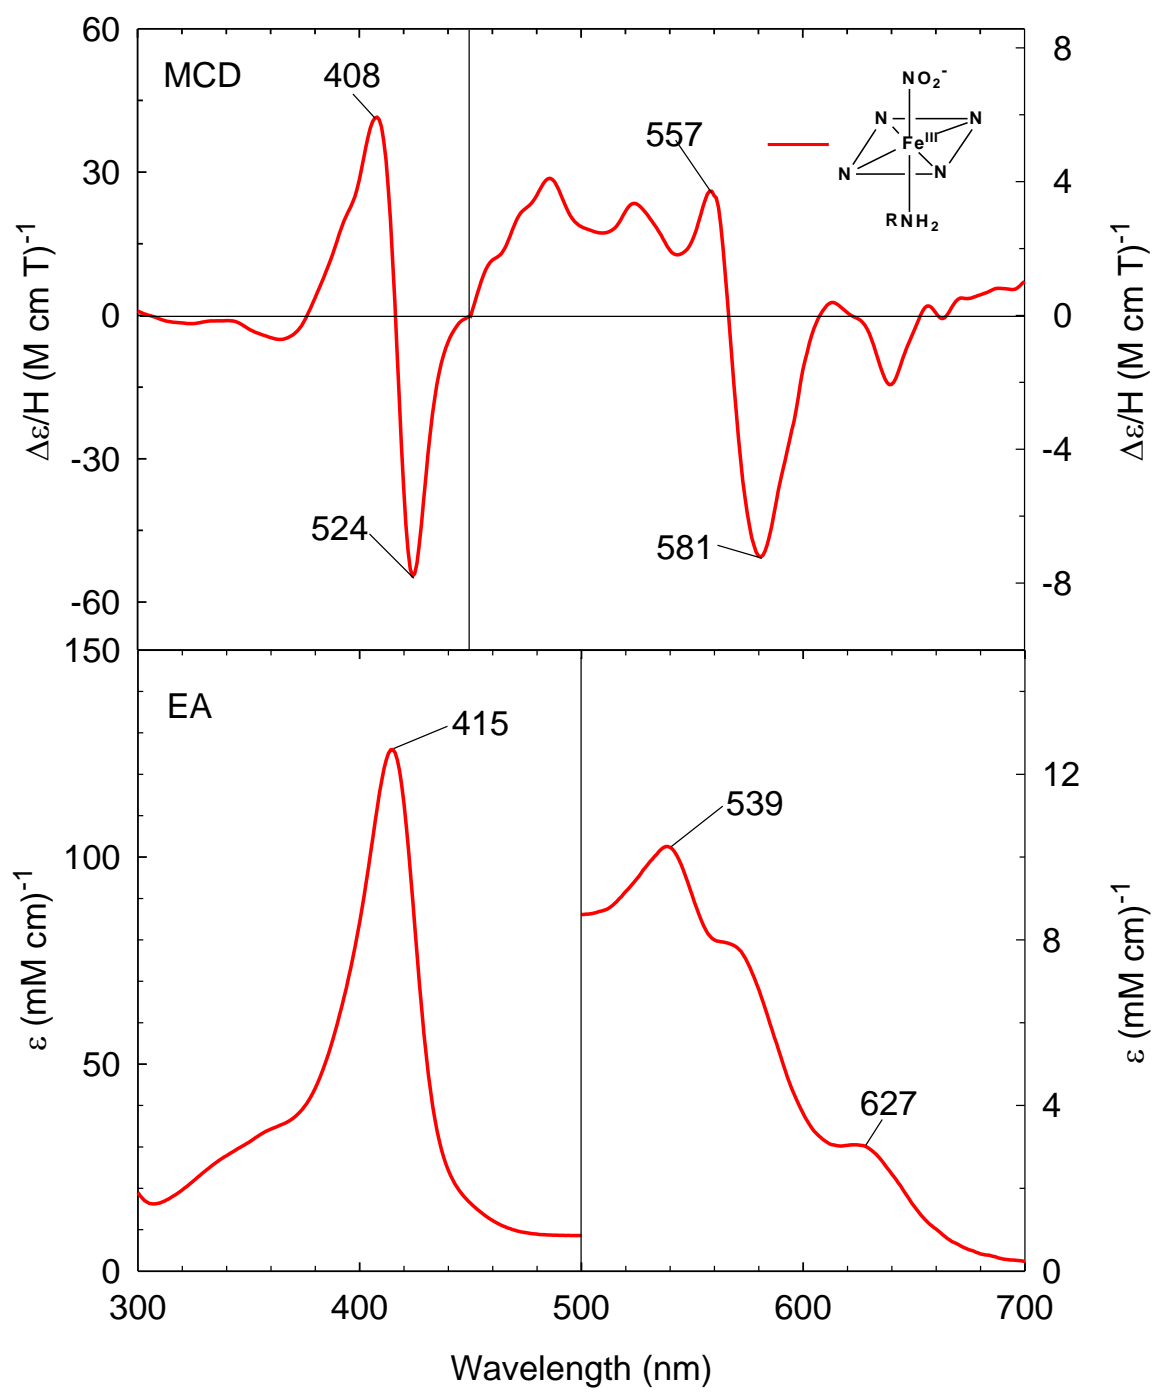

Figure S6

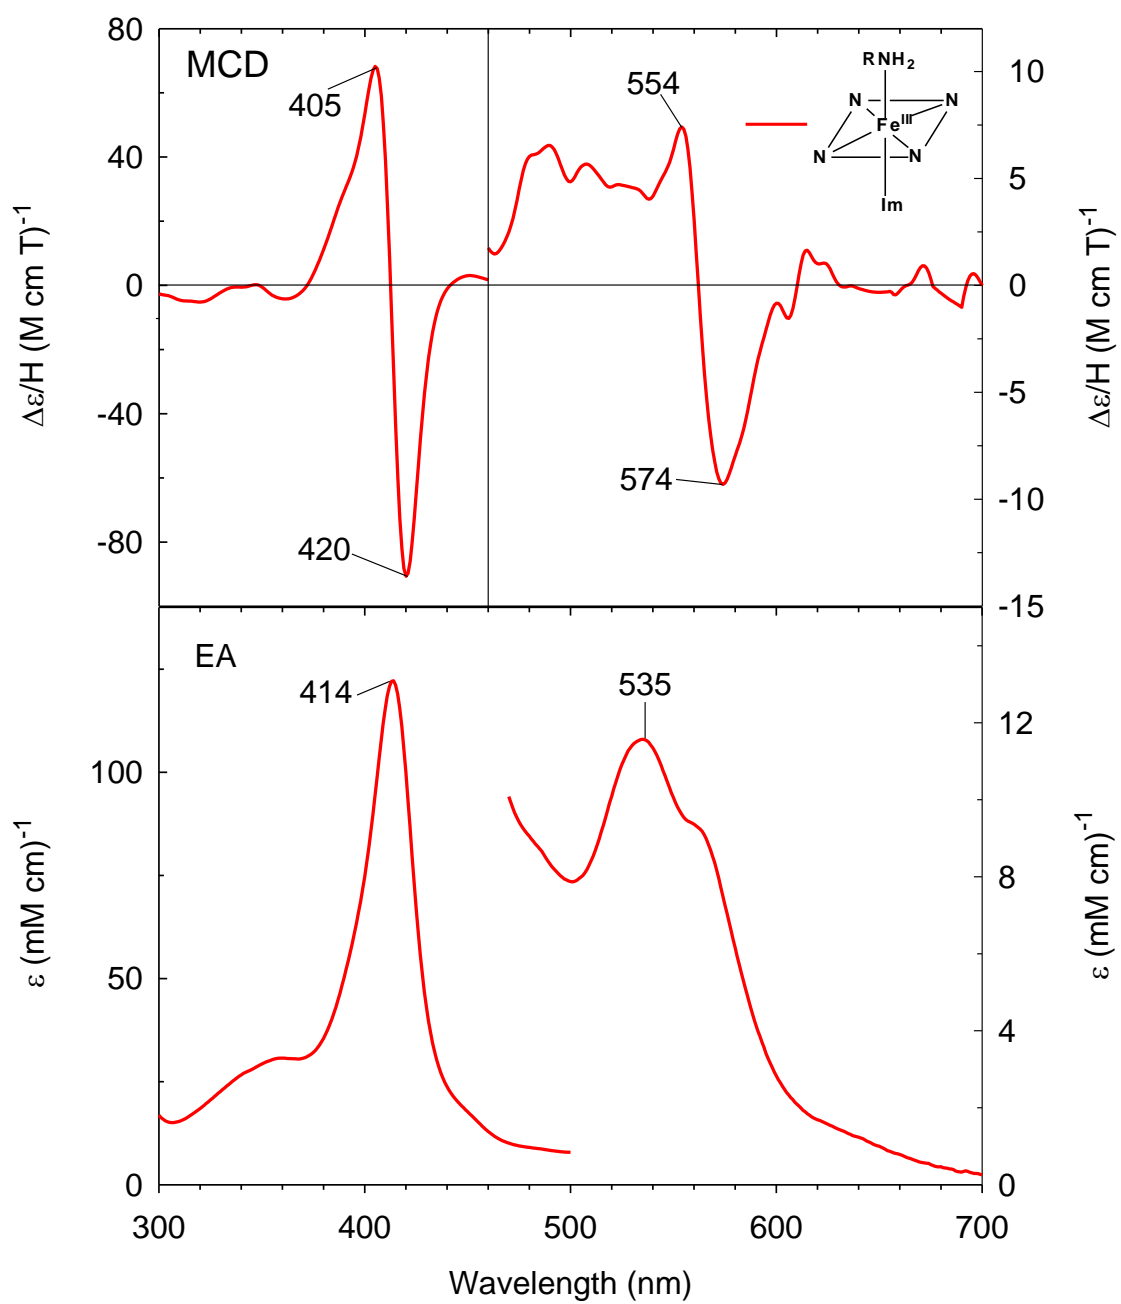

Figure S7

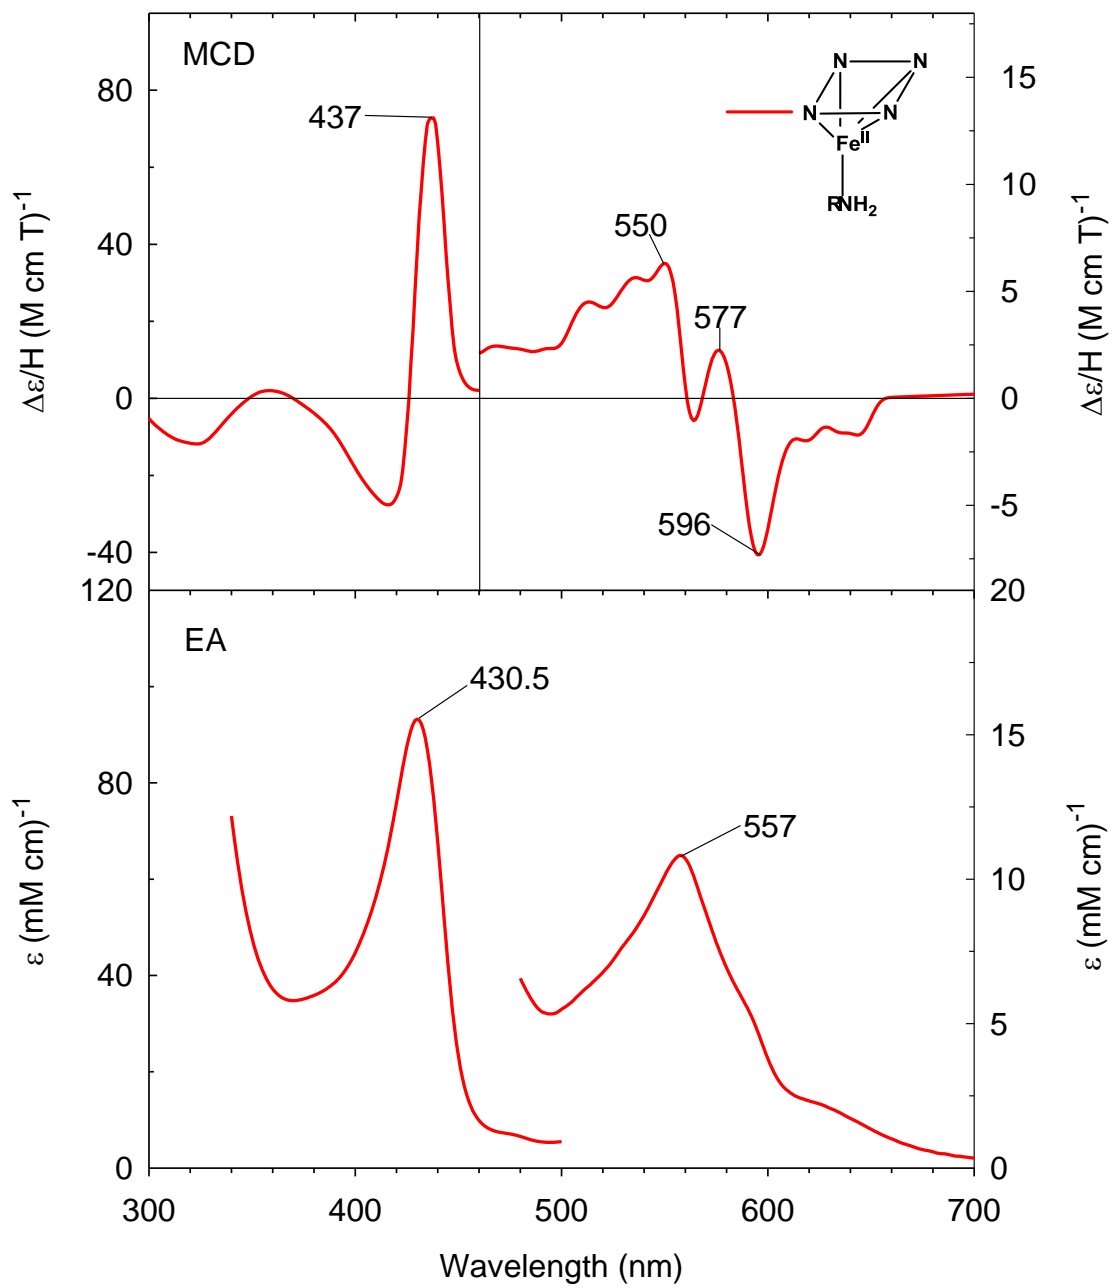

Figure S8

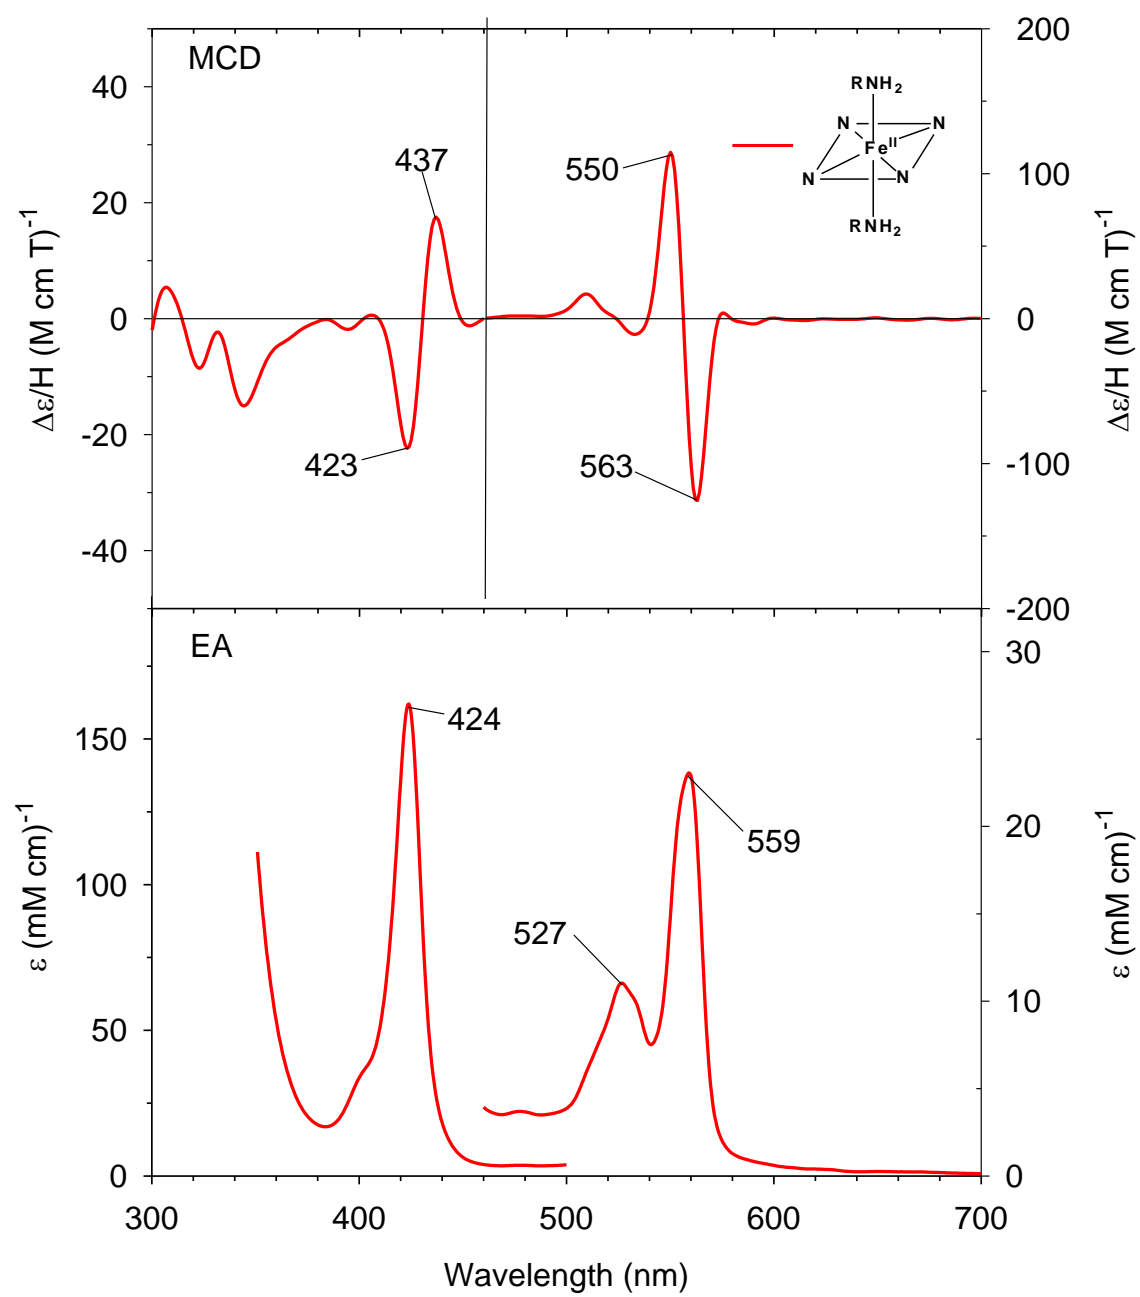

Figure S9

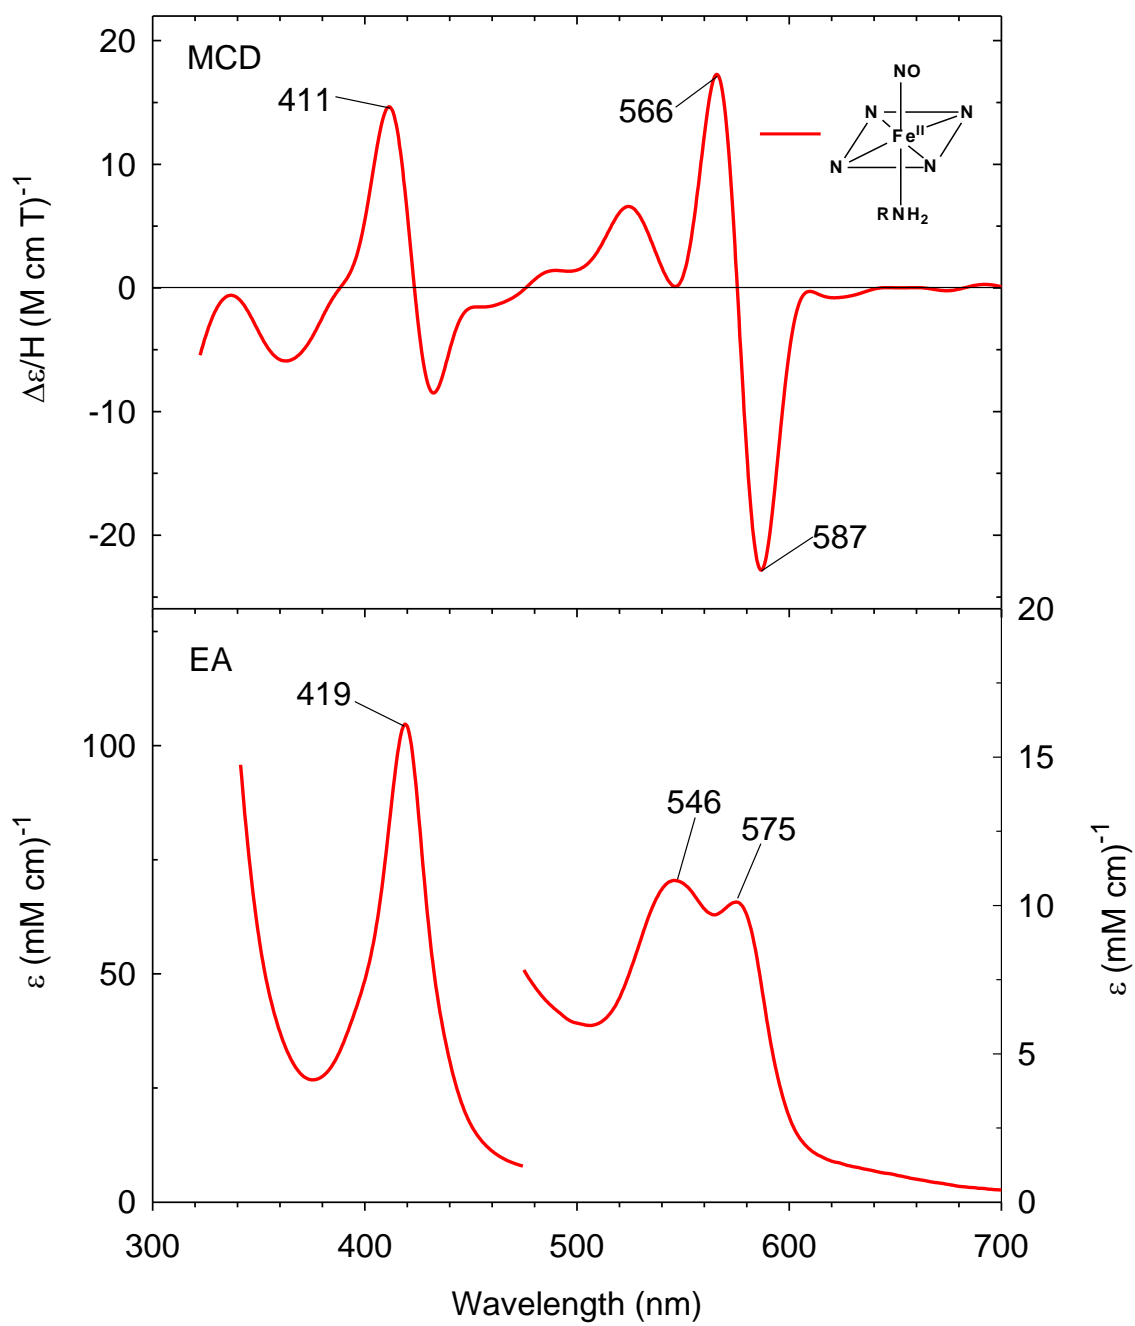

Figure S10

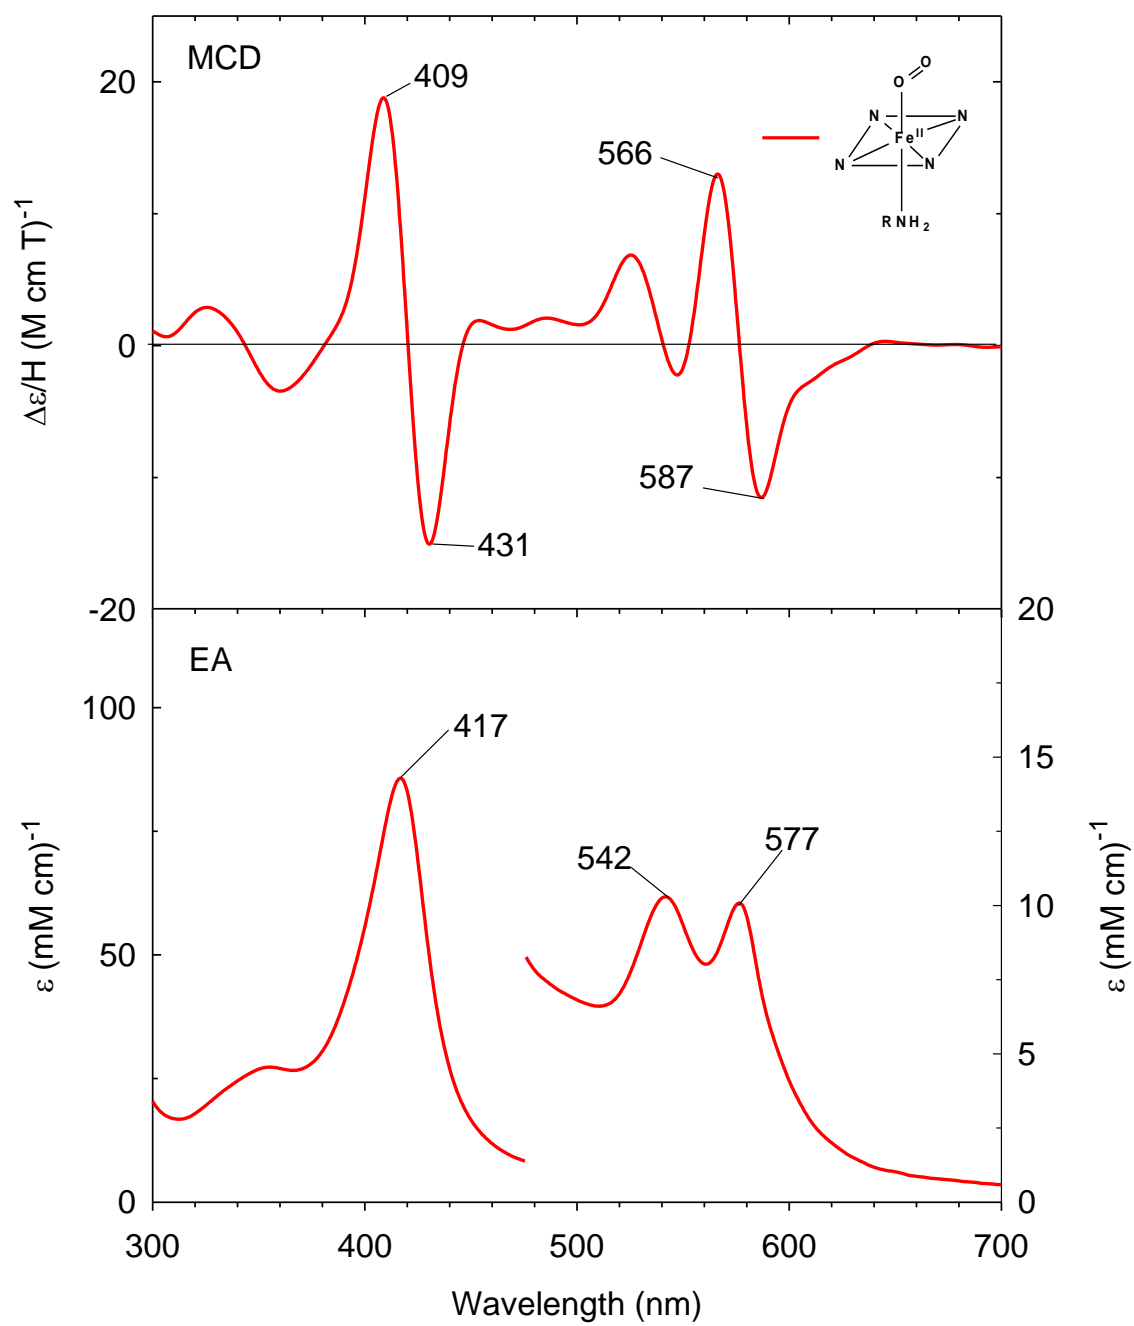

Figure S11

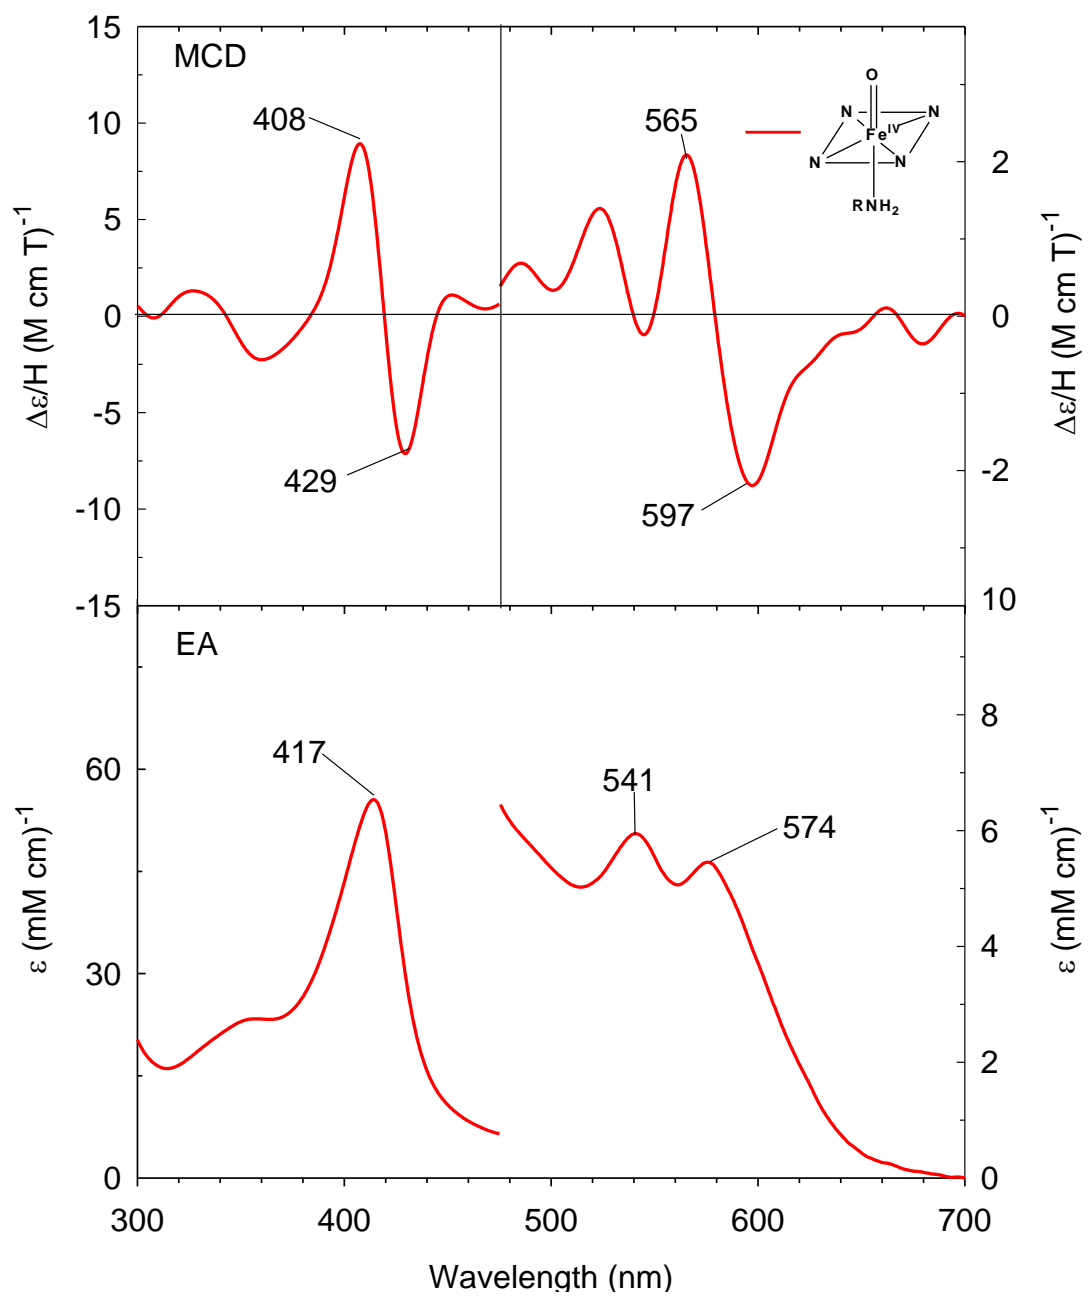

Figure S12



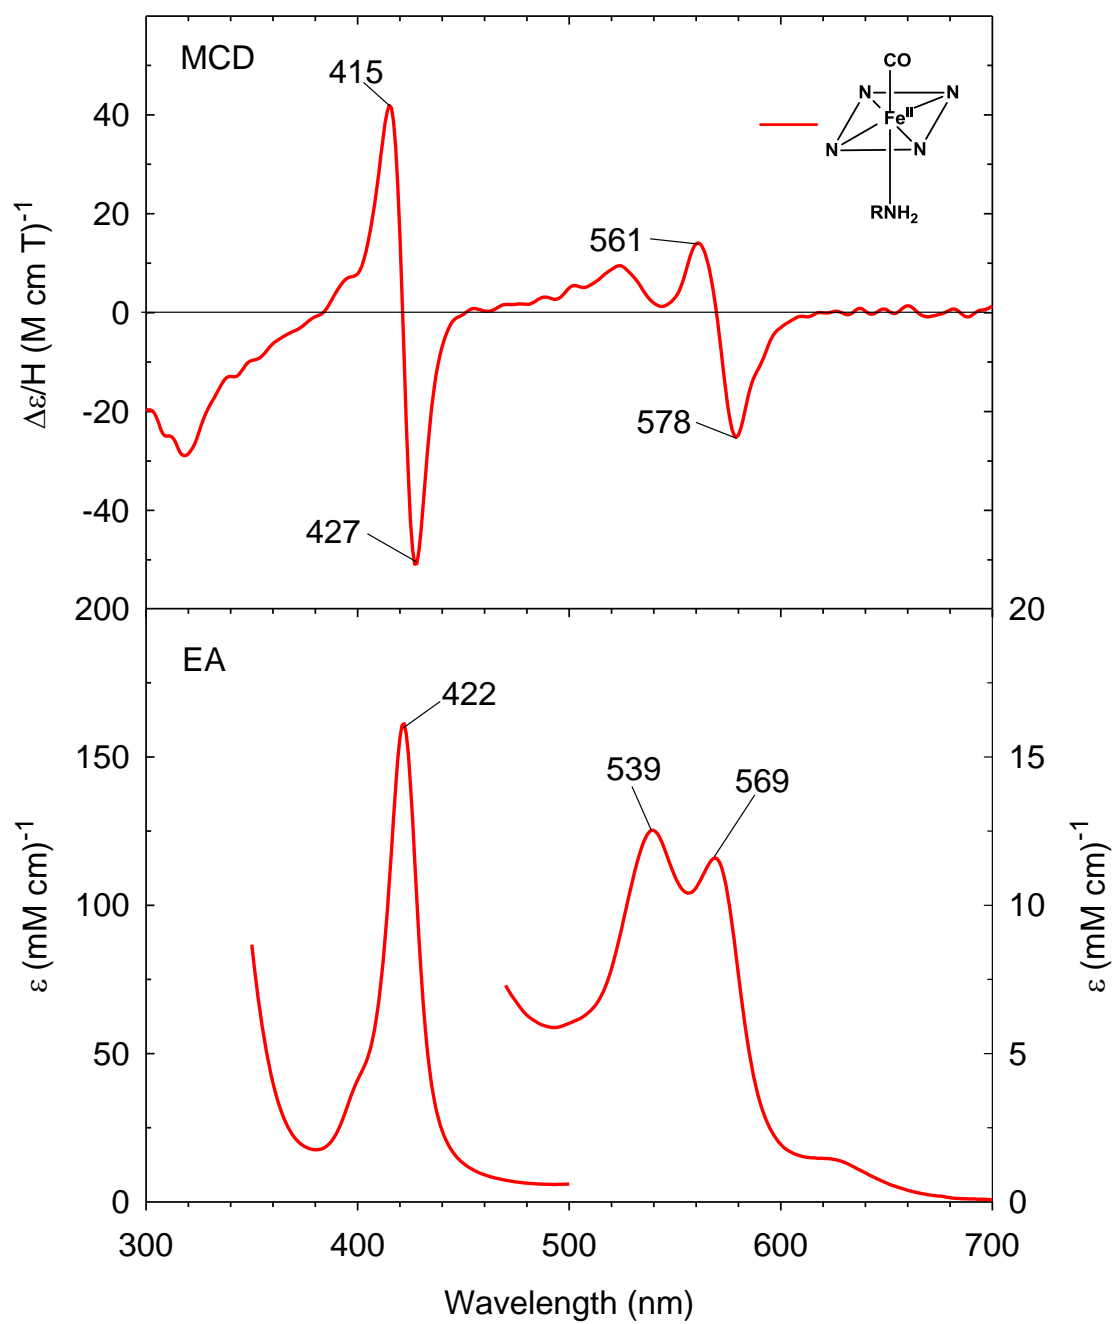

Figure S13
